## **$\Delta$ Np63 isoform-mediated $\beta$ -defensin family up-regulation is associated with (lymph)angiogenesis and poor prognosis in patients with squamous cell carcinoma**

**Meggy Suarez-Carmona<sup>1,2,\*</sup>, Pascale Hubert<sup>1,\*</sup>, Arnaud Gonzalez<sup>3</sup>, Anaëlle Duray<sup>4</sup>, Patrick Roncarati<sup>1</sup>, Charlotte Erpicum<sup>2</sup>, Jacques Boniver<sup>1</sup>, Vincent Castronovo<sup>3</sup>, Agnès Noel<sup>2</sup>, Sven Saussez<sup>4</sup>, Olivier Peulen<sup>3</sup>, Philippe Delvenne<sup>1,\*\*</sup> and Michael Herfs<sup>1,\*\*</sup>**

<sup>1</sup> Laboratory of Experimental Pathology, GIGA-Cancer, University of Liege, Liege, Belgium

<sup>2</sup> Laboratory of Tumor and Developmental Biology, GIGA-Cancer, University of Liege, Liege, Belgium

<sup>3</sup> Metastasis Research Laboratory, GIGA-Cancer, University of Liege, Liege, Belgium

<sup>4</sup> Laboratory of Anatomy, Faculty of Medicine and Pharmacy, University of Mons, Mons, Belgium

\* These authors contributed equally to this work

\*\* These authors share last authorship

**Correspondence to:** Michael Herfs, **email:** M.Herfs@ulg.ac.be

**Keywords:** p63, defensins, (lymph)angiogenesis, prognosis, squamous cell carcinoma

**Received:** January 17, 2014

**Accepted:** March 19, 2014

**Published:** March 21, 2014

This is an open-access article distributed under the terms of the Creative Commons Attribution License, which permits unrestricted use, distribution, and reproduction in any medium, provided the original author and source are credited.

### **ABSTRACT:**

**Beside a role in normal development/differentiation, high p63 immunoreactivity is also frequently observed in squamous cell carcinoma (SCC). Due to the complexity of the gene, the role of each p63 isotype in tumorigenesis is still confusing. Constitutively produced or induced in inflammatory conditions, human beta-defensins (H $\beta$ Ds) are cationic peptides involved in host defenses against bacteria, viruses and fungi. Here, we investigated both the role of p63 proteins in the regulation of H $\beta$ Ds and the implication of these antimicrobial peptides in tumor (lymph)angiogenesis. Thus, in contrast to TAp63 isoforms, we observed that  $\Delta$ Np63 proteins ( $\alpha$ ,  $\beta$ ,  $\gamma$ ) induce H $\beta$ D1, 2 and 4 expression. Similar results were observed in cancer tissues and cell lines. We next demonstrated that  $\Delta$ Np63-overexpressing SCC are associated with both a poor prognosis and a high tumor vascularisation and lymphangiogenesis. Moreover, we showed that H $\beta$ Ds exert a chemotactic activity for (lymphatic) endothelial cells in a CCR6-dependent manner. The ability of H $\beta$ Ds to enhance (lymph)angiogenesis in vivo was also evaluated. We observed that H $\beta$ Ds increase the vessel number and induce a significant increase in relative vascular area compared to negative control. Taken together, the results of this study suggest that  $\Delta$ Np63-regulated H $\beta$ D could promote tumor (lymph)angiogenesis in SCC microenvironment.**

### **INTRODUCTION**

Member of the p53 family, *TP63* gene gives rise to transcripts that encode either full-length isoforms containing an amino-transactivation (TA) domain (TAp63) or truncated isoforms that lack this TA domain ( $\Delta$ Np63). Both TA and  $\Delta$ N transcripts undergo C-terminal alternative splicing to yield six further carboxyl-terminal isoforms ( $\alpha$ ,  $\beta$ ,  $\gamma$ ) [1]. In the last decade, the implication of p63 proteins in epithelial stratification [2], differentiation [3] and in the maintenance of the proliferative potential of epithelial

stem cells [4] has been well established. In addition to their role in normal development and homeostasis, the large majority of squamous malignancies display p63 immunoreactivity suggesting that, similar to p53, p63 is also acting during tumorigenesis [5]. However, due to both the complexity of the gene and the lack of reliable antibodies for each individual isotype, the role of p63 in cancer is still controversial and subject to debate [6, 7]. Recent data suggested that *p63* could play a dual function. Indeed, several studies have highlighted the oncogenic potential of  $\Delta$ Np63 $\alpha$  [8-11]. In contrast, other data show

that the *p63* gene, especially TAp63 isoforms, could act as a tumor suppressor [12-14], although *p63* is rarely mutated in human cancer in contrast to classic tumor suppressor genes.

Defensins are a family of small (2–6 kDa) cationic, antimicrobial peptides either constitutively secreted or induced in inflammatory conditions. Based on their amino acid sequence and pattern of disulfide bonding, mammalian defensins are classified into two main subfamilies:  $\alpha$  and  $\beta$  defensins. Abundantly expressed by polynuclear neutrophils,  $\alpha$  defensins were also isolated from subpopulations of macrophages and Paneth cells of the small intestine. To date, six human beta defensins (H $\beta$ D1 to 6) have been discovered and cloned. Whereas H $\beta$ D5 and H $\beta$ D6 are specifically produced in the human epididymis, H $\beta$ D1-4 are expressed by epithelial cells lining numerous organs (oral, nasal and epidermal mucosa, lungs, gastrointestinal and urogenital tracts) [15-17]. Through their direct antimicrobial activities, H $\beta$ Ds have emerged as important effectors of innate immunity [17]. Moreover, H $\beta$ Ds induce T cell and immature dendritic cell chemotaxis through chemokine receptor CCR6 and, therefore, might also link innate and adaptive immune responses [18-20]. Besides their role in the host defense, recent reports suggest that H $\beta$ D expression could enhance tumor progression through unclear mechanisms [21]. By inducing dendritic cell and tumor-associated macrophage chemoattraction into cancerous lesions, it was proposed that H $\beta$ Ds could stimulate the production of tumor-promoting cytokines [22]. Moreover, *in vitro* data support that H $\beta$ D2 could have some pro-angiogenic abilities [23].

The purpose of this study was to examine the regulation of H $\beta$ D expression by p63 isoforms, as suggested in published microarray analyses [3, 24], and the implication of these small antimicrobial peptides in tumor vascularization and lymphangiogenesis. We showed that  $\Delta$ Np63 proteins ( $\alpha$ ,  $\beta$ ,  $\gamma$ ) induce H $\beta$ D1, 2 and 4 up-regulation whereas TAp63 isotypes do not modify H $\beta$ D expression. These *in vitro* data were congruent with results obtained in cancer tissues [squamous cell carcinoma (SCC)]. Through a series of *in vitro* and *in vivo* experiments, we also demonstrated that  $\Delta$ Np63-regulated H $\beta$ Ds are associated with tumor angiogenesis and lymphangiogenesis.

## RESULTS

### Positive association between $\Delta$ Np63 expression and H $\beta$ D1, 2 and 4 levels in human keratinocytes and SCC cell lines.

To determine the possible relationship between p63 isoforms and H $\beta$ D family, we first analyzed their expression (Western blot and/or RT-PCR) in human

normal keratinocytes (HaCaT) as well as in two head and neck (Detroit 562, RPMI 2650) and three genital (A431, HT-3, SiHa) SCC cell lines. As shown in Figure 1A-B, all these cells expressed TAp63. Regarding  $\Delta$ Np63 expression, normal keratinocytes and several SCC cell lines (A431, HT-3, Detroit 562) exhibited extremely high protein and mRNA levels of  $\Delta$ Np63 whereas SiHa and RPMI 2650 cells did not express this p63 isoform. Interestingly, in contrast to other cell lines, no or a weak mRNA expression of H $\beta$ D1, 2 and 4 was observed in SiHa and RPMI 2650. No difference in H $\beta$ D3 expression was detected between  $\Delta$ Np63-positive and negative cells. Therefore, our data suggest that  $\Delta$ Np63 could be involved in the regulation of H $\beta$ D1, 2 and 4 expression.

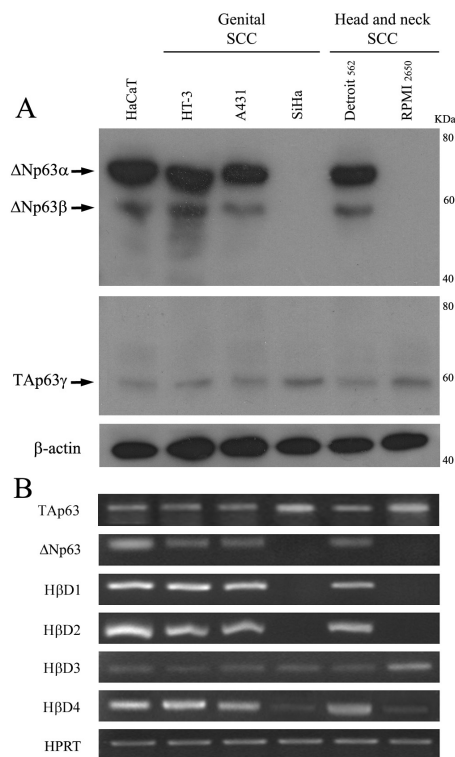

**Figure 1: Expression of the p63 isoforms and H $\beta$ Ds in human normal keratinocytes and SCC cell lines.**

A: Both  $\Delta$ Np63 and TAp63 isotypes were detected by Western blot using anti-p40 ( $\Delta$ N) and anti-TAp63 antibodies. B: RT-PCR analysis of H $\beta$ D1, H $\beta$ D2, H $\beta$ D3, H $\beta$ D4,  $\Delta$ Np63 and TAp63 isoform expression was performed on mRNA isolated from normal keratinocytes (HaCaT cells) and five human SCC cell lines. HPRT was used as controls for RNA loading.  $10^5$  cells (from every analyzed cell line) were plated in six-well plates. When 60–70% confluence was reached, cells were lysed and subsequent Western Blot or RT-PCR analyses were performed. The experimental procedures are extensively described in the “Materials and Methods” section. A representative experiment is shown of three independent experiments performed.

## $\Delta$ Np63 isoforms regulate H $\beta$ D1, 2 and 4 expression.

To examine whether p63 proteins could regulate H $\beta$ D expression, we transfected different p63 isoform cDNA sequences in normal keratinocytes and HT-3 SCC cell lines. p63 isoforms were upregulated at 24h (data not shown) and remained overexpressed until 48h (Figure 2A). H $\beta$ D expression was assessed by real-time RT-PCR. Each experiment was normalized to the amount of HPRT mRNA from the same sample. As a control, cells were transfected with the corresponding empty vector. We showed that transient transfection of  $\Delta$ Np63 isoform cDNAs (Figure 2B-E) for 48h significantly induce H $\beta$ D1, 2 and 4 expression in HaCaT cells. No statistical difference in H $\beta$ D3 expression was observed (Figure 2D). In contrast to  $\Delta$ Np63 isoforms, TAp63 $\alpha$ ,  $\beta$  and  $\gamma$  did not alter the pattern of H $\beta$ D expression (Figure 2B-E). No synergistic effect was detected when cells were simultaneously transfected with all  $\Delta$ Np63 isoform cDNAs

(data not shown). Similar results were observed with the cervical HT-3 SCC cell line (data not shown). In order to determine whether  $\Delta$ Np63 isoforms influence H $\beta$ D mRNA stability, we evaluated the rate of mRNA degradation. The RNA transcription activity was inhibited by actinomycin D and the mRNA level of H $\beta$ D 1, 2 and 4 relative to GAPDH mRNA was then determined by quantitative real-time PCR. HaCaT cells were transiently transfected with  $\Delta$ Np63 $\alpha$  cDNA and, 24h after transfection, the cells were treated with 5 $\mu$ g/ml actinomycin D. The levels of H $\beta$ D 1, 2 and 4 mRNA transcripts were determined at 1, 2, 4 and 6h following actinomycin D addition. Compared to control cells (empty vector), no significant difference of the rate of H $\beta$ D 1, 2 and 4 decay was observed in  $\Delta$ Np63 $\alpha$ -transfected cells (Figure 2F). Similar results were obtained with other  $\Delta$ Np63 isotypes (data not shown). These data suggest that  $\Delta$ Np63 do not modulate H $\beta$ D transcript levels via an increased mRNA stability.

Inversely, we investigated the effect of an inhibition of  $\Delta$ Np63 on H $\beta$ D1, 2 and 4 expression using RNA interference strategy both in normal keratinocytes and cancer cells. siRNA transfection efficiency was assessed by flow cytometry (Figure 3A).  $\Delta$ Np63 silencing efficiency (24, 48 and 72h after transfection) was analyzed by real-time RT-PCR (Figure 3B), Western blot (Figure 3C) and immunohistochemistry (Figure 3G). As a

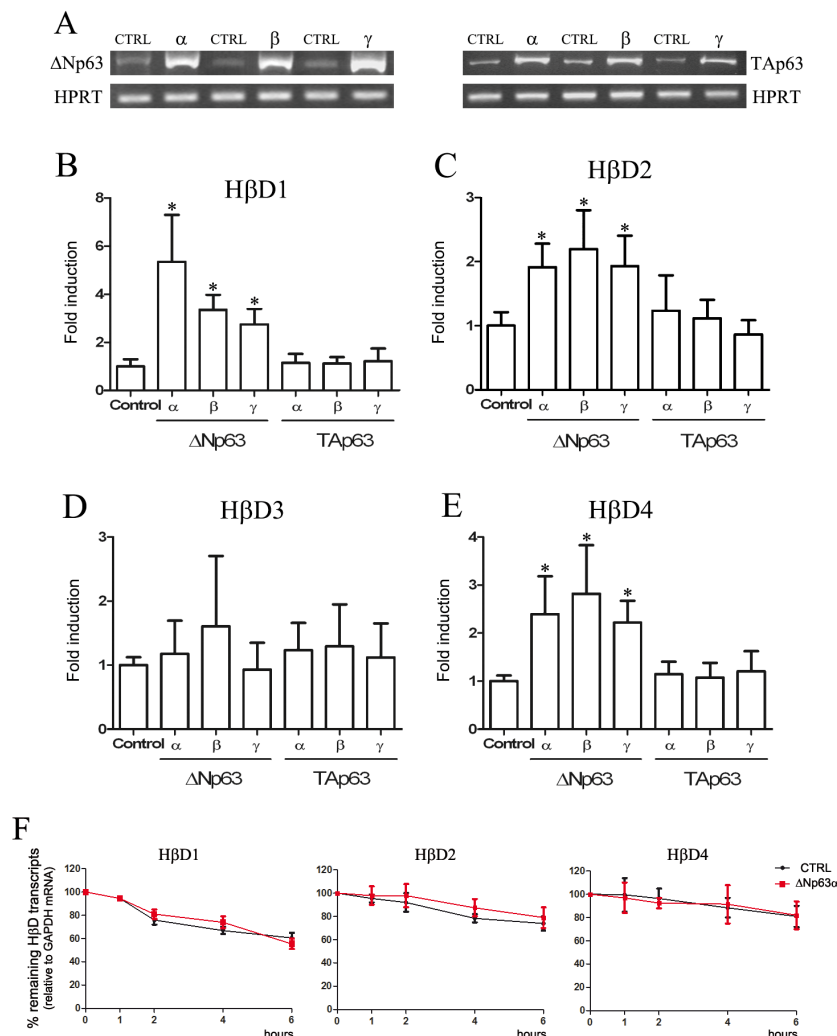

**Figure 2: H $\beta$ D1, H $\beta$ D2 and H $\beta$ D4 expression is up-regulated by  $\Delta$ Np63 transfection.** A: cDNA corresponding to different p63 isotypes were transfected in HaCaT cells. Forty-eight hours after transfection, mRNAs were extracted and RT-PCR analyses were performed using primers specific for each p63 isoform. B-E: Real-time RT-PCR analysis of H $\beta$ D1, H $\beta$ D2, H $\beta$ D3 and H $\beta$ D4 expression were performed on mRNA isolated from HaCaT cells transiently transfected with the different p63 isoform cDNAs. At 48h after transfection, cells were collected for transcriptional analysis. The experimental procedures are extensively described in the "Materials and Methods" section. F:  $\Delta$ Np63-transfected cells were treated with 5 $\mu$ g/ml actinomycin D 24h after transfection. mRNAs were isolated at the indicated times after actinomycin D application. Each real-time RT-PCR experiment was normalized to the amount of GAPDH mRNA from the same sample. Results are the means  $\pm$  SD of four independent transfection experiments performed in duplicate. Asterisks indicate statistically significant differences (\* $P$  < 0.05).

control, cells were transfected with a siRNA which does not match to any sequence in the human genome. Results indicated that  $\Delta$ Np63 silencing significantly reduce H $\beta$ D1, 2 and 4 expression in normal and cancer cells (at least 30% decrease compared to siRNA control-transfected cells) (Figure 3D-F). This downregulation of H $\beta$ D1, 2 and 4 in  $\Delta$ Np63-silenced cells was also observed at the protein level (Figure 3G).

### $\Delta$ Np63 immunoreactivity is associated with high levels of H $\beta$ D1, 2 and 4 expression in cervical and head and neck SCC

By immunohistochemistry, the expression of H $\beta$ D1, 2, 4 and  $\Delta$ Np63 was then investigated in 18 cervical and 39 head and neck SCC specimens (Figure 4). Positive staining for  $\Delta$ Np63 was observed in 54 tissue samples (94.7%). However, variable degrees of

nuclear  $\Delta$ Np63 expression were detected (Figure 4A). High expression of  $\Delta$ Np63 (score >3) was observed in 9 (50%) cases of cervical SCC and in 21 (53.8%) cases of head and neck SCC. Furthermore, we analyzed H $\beta$ D1, 2 and 4 expression in all these tissue specimens. These peptides were distributed in the cytoplasm of neoplastic cells. A nuclear H $\beta$ D1 staining was also observed in 16 cases (28.1%) (Supplemental Figure 1). We showed that tumors with a highly positive  $\Delta$ Np63 immunoreactivity were significantly associated with a global up-regulation of H $\beta$ D1, 2 and 4 (Figure 4B). Indeed, a co-expression of  $\Delta$ Np63 and h $\beta$ Ds was observed in numerous serial sections of SCC (Supplemental Figure 2). A similar association between h $\beta$ D immunoreactivity and  $\Delta$ Np63 expression was observed in normal squamous epithelia (Supplemental Figure 3). A Spearman correlation between  $\Delta$ Np63 and H $\beta$ D scores was also observed both in patients with cervical and head and neck SCC (Supplemental Figure 4). These results support the involvement of  $\Delta$ Np63

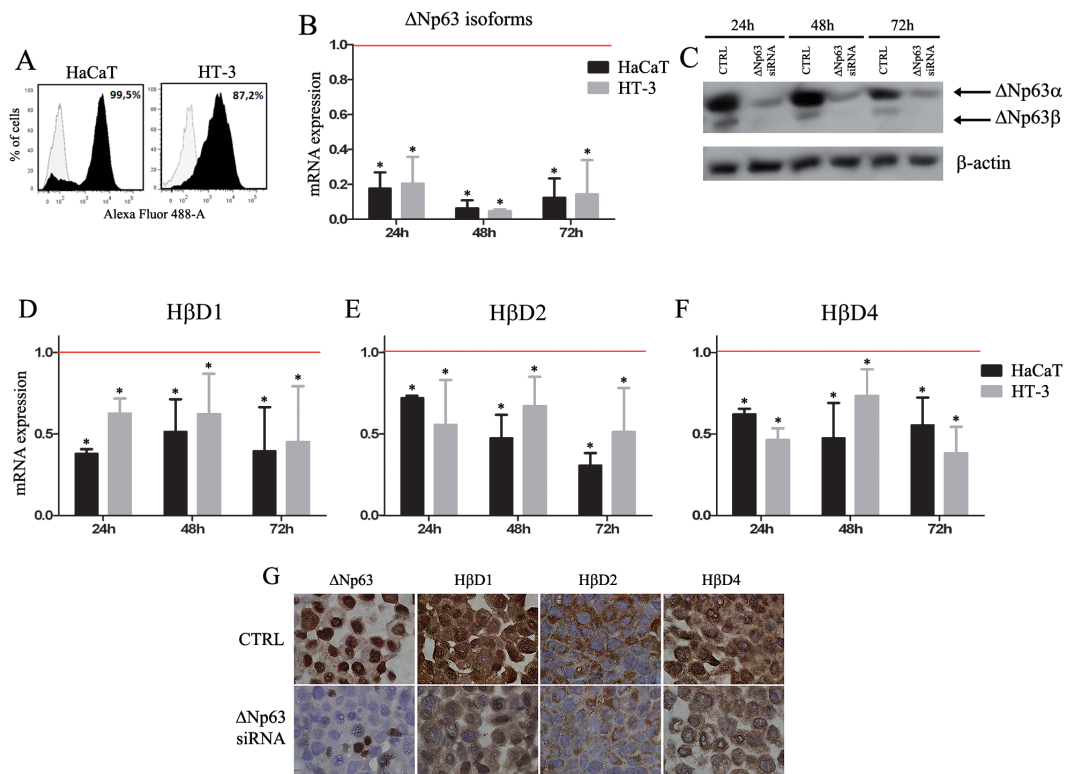

**Figure 3:  $\Delta$ Np63 silencing reduces H $\beta$ D1, H $\beta$ D2 and H $\beta$ D4 expression in both normal keratinocytes and cancer cells.** A: First, siRNA transfection efficiency was assessed by flow cytometry using a Alexa Fluor 488-labeled control siRNA. B: Real-time RT-PCR analyses of  $\Delta$ Np63 isoform expression were performed on mRNA isolated from  $\Delta$ Np63 siRNA-transfected HaCaT and HT-3 cells. As a control, these cell lines were transfected with a siRNA which does not match to any sequence in the human genome. Each experiment was normalized to the amount of HPRT mRNA from the same sample. Results are the means  $\pm$  SD of four independent transfection experiments performed in duplicate. C:  $\Delta$ Np63 protein levels were also determined by Western blot in the  $\Delta$ Np63-silenced HaCaT cells compared with the control cells. A representative experiment is shown of three independent experiments performed. D-F: Real-time RT-PCR analyses of H $\beta$ D1, H $\beta$ D2 and H $\beta$ D4 expression were performed on mRNA isolated from  $\Delta$ Np63-silenced HaCaT and HT-3 cells. Each real-time RT-PCR experiment was normalized to the amount of HPRT mRNA from the same sample. Results are the means  $\pm$  SD of four independent transfection experiments performed in duplicate. Red bars represent corresponding controls for each condition. Asterisks indicate statistically significant differences (\* $P$  < 0.05). G: The H $\beta$ D protein level was also evaluated on HaCaT cells transfected or not with  $\Delta$ Np63 siRNA. A reduced H $\beta$ D1, 2 and 4 immunoreactivity was observed in  $\Delta$ Np63-silenced cells.

in the regulation of HβD1, 2 and 4 in cancer tissues.

### Prognostic value of ΔNp63 expression in head and neck SCC samples.

Due to the very few number of clinical data available [6 (33%) out of 18 patients], the prognostic value of cervical SCC samples was not analyzed. The follow-up data of the head and neck SCC patients for up to 138 months were used to evaluate the impact of ΔNp63 expression on overall survival. The series of head and neck SCC specimens presented in this study was composed of men (n=33) and women (n=6) from 40 to 79 years of age. Eighteen (46.2%) of these cancers were infected by high-risk HPV. Importantly, 27 (69.2%) and 12 (30.7%) of these patients were respectively active smokers or drinkers. None of these clinicopathological

features were correlated with a high ΔNp63 expression (Table 1). During the follow-up period, 11 of 21 (52.3%) patients in the “ΔNp63++” group and 4 of 18 (22.2%) patients in the “ΔNp63+/-” group died. Based on Kaplan-Meier survival analysis, overall survival for patients with ΔNp63-overexpressing SCC was significantly decreased compared to that for individuals with cancers displaying a weakly positive ΔNp63 immunoreactivity (Figure 4C).

### HβD1, 2 and 4 enhance tumor angiogenesis in ΔNp63-positive SCC through promoting endothelial cells migration.

We next analyzed the blood vessel density in high and low ΔNp63-expressing cervical and head and neck SCC using anti-CD105 antibody. Also called endoglin, this accessory protein of the transforming growth factor

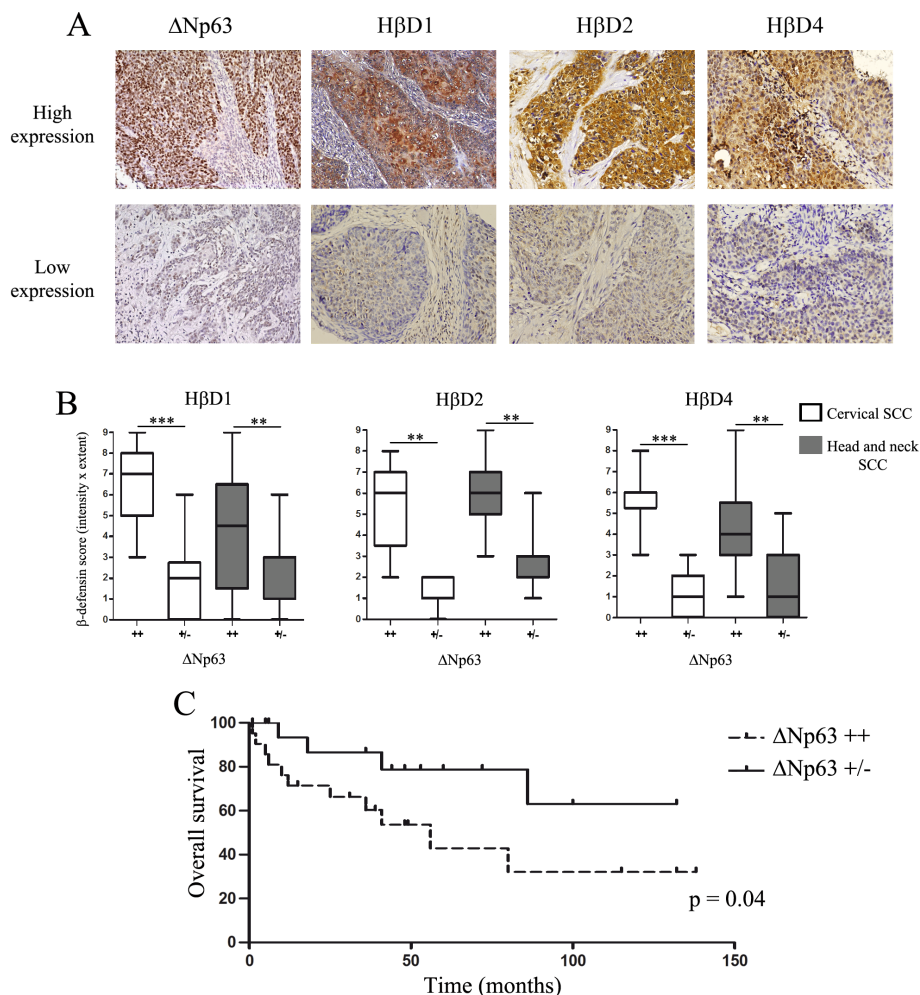

**Figure 4: High HβD1, 2 and 4 immunoreactivity is observed in human SCC overexpressing ΔNp63.** A: HβD1, HβD2, HβD4 and ΔNp63 expression in paraffin-embedded sections of human SCC specimens was assessed by immunohistochemistry. We observed variable degrees of HβD1, HβD2, HβD4 and ΔNp63 expression. B: Semiquantitative evaluation of HβD1, HβD2 and HβD4 expression in 18 cervical and 39 head and neck SCC specimens. The tissue samples were classified into two groups according to ΔNp63 immunoreactivity (high: ++, low: +/-). Asterisks indicate statistically significant differences (\*\*P < 0.01, \*\*\*P < 0.001). Original magnifications: X200. C: Kaplan-Meier curve (overall survival) for patients with head and neck SCC expressing low (n= 18) or high (n=21) levels of ΔNp63.

| <b>Table 1: Variable analysis for <math>\Delta</math>Np63 expression in head and neck SCC</b> |                    |                   |        |
|-----------------------------------------------------------------------------------------------|--------------------|-------------------|--------|
|                                                                                               | High $\Delta$ Np63 | Low $\Delta$ Np63 |        |
|                                                                                               |                    |                   | P      |
| Clinical factors                                                                              |                    |                   |        |
| Age (y), median (SD)                                                                          | 58.1 (8.4)         | 57.6 (10.1)       |        |
| Sex                                                                                           |                    |                   | 0,6674 |
| Male                                                                                          | 17                 | 16                |        |
| Female                                                                                        | 4                  | 2                 |        |
| Smoker                                                                                        |                    |                   | 1      |
| yes                                                                                           | 15                 | 12                |        |
| no                                                                                            | 6                  | 6                 |        |
| Drinker                                                                                       |                    |                   | 1      |
| yes                                                                                           | 6                  | 6                 |        |
| no                                                                                            | 15                 | 12                |        |
| Primary site                                                                                  |                    |                   | 0,5279 |
| Oral cavity                                                                                   | 8                  | 9                 |        |
| Oropharynx                                                                                    | 13                 | 9                 |        |
| T stage                                                                                       |                    |                   | 0,7424 |
| T1-T2                                                                                         | 14                 | 13                |        |
| T3-T4                                                                                         | 7                  | 5                 |        |
| HPV DNA                                                                                       |                    |                   | 0,738  |
| positive                                                                                      | 9                  | 9                 |        |
| negative                                                                                      | 10                 | 7                 |        |

beta receptor system is highly expressed on vascular endothelial cells [25]. Through CD105 immunolabeling on tumor sections, the average number of neoformed blood vessels per mm<sup>2</sup> was evaluated by image analysis. As shown in Figure 5A-B, we observed that  $\Delta$ Np63-overexpressing SCC are associated with a significantly higher tumor vascularisation compared to cancers displaying a weakly positive  $\Delta$ Np63 immunoreactivity.

In order to explore the  $\Delta$ Np63-regulated H $\beta$ D impact on the endothelial cell recruitment, Boyden Chamber migration assays were performed. As expected, VEGF-A elicited a considerable HUVEC migration, rising to 340% of the control (Figure 5C). A significant chemotactic activity of H $\beta$ D1, 2 and 4 was observed for endothelial cells at a concentration as low as 0.25  $\mu$ g/ml. When employed at a 0.5  $\mu$ g/ml concentration, these three H $\beta$ Ds elicited a chemotactic effect similar to that exerted by VEGF-A, the positive control (Figure 5C). Furthermore, the H $\beta$ D1, 2 and 4-dependent chemotaxis was similar when 0.5  $\mu$ g/ml or higher concentrations were used (Figure 5C). We next investigated the involvement of chemokine receptor CCR6 on the capacity of vascular endothelial cells to migrate toward H $\beta$ Ds. Interestingly,

pretreatment of the endothelial cells with a CCR6-blocking antibody partially abrogated the migration induced by H $\beta$ Ds (Figure 5D). We also observed that, similar to VEGF-A, H $\beta$ D1 promoted endothelial cell proliferation/viability (Figure 5E-F). In contrast, cell growth was not significantly modified when H $\beta$ D2 and 4 were used. The angiogenic activity of H $\beta$ Ds *in vivo* was then investigated using the CAM assay (Figure 5G). On day 10, there was a high density of blood vessels within and around the methylcellulose sponge in CAMs exposed to VEGF-A and H $\beta$ Ds. Each CAM section was immunostained for alpha SMA, a marker whose expression is relatively restricted to vascular smooth muscle cells. We observed that both VEGF-A and H $\beta$ Ds induce a significant increase in relative vascular area compared to negative control (PBS) (Figure 5H). This higher blood vessel area observed in the presence of VEGF-A and H $\beta$ Ds relied on an increased vessel number (Figure 5I). Confirming the implication of H $\beta$ Ds in angiogenesis, an association between H $\beta$ D expression level (mainly H $\beta$ D1 and 2) and the density of blood vessels in both cervical and head and neck tumor specimens was observed (Supplemental Figure 5). Although we fail to reach a statistical significance in SCC tissues with H $\beta$ D4, our data suggest that these peptides play a relevant role in tumor angiogenesis.

### **$\Delta$ Np63-regulated H $\beta$ Ds enhance lymphangiogenesis by inducing lymphatic endothelial cell chemotaxis**

The lymphatic vasculature was finally investigated in cervical and head and neck SCC, by evaluating the average number of podoplanin<sup>+</sup> vessels per mm<sup>2</sup>. Significantly increased density of lymphatic vessels was detected in high  $\Delta$ Np63-expressing SCC when compared to tumors with a weakly positive  $\Delta$ Np63 immunoreactivity (Figure 6A-B).

The influence of  $\Delta$ Np63-regulated H $\beta$ Ds on chemotactic migration of lymphatic endothelial cells was then assessed using a Boyden chamber assay. As shown in Figure 6C, a significant increased migration of immortalized (hTERT-LEC) lymphatic endothelial cells was observed in the presence of both VEGF-C (positive control) and H $\beta$ D1, 2, 4 compared to negative control. Moreover, the chemotactic activity of H $\beta$ Ds on lymphatic endothelial cells was similar when we used 0.5  $\mu$ g/ml or higher concentrations (Figure 6C). Similar results were obtained with normal cells (HMVEC) (Supplemental Figure 6). H $\beta$ D-dependent enhanced migration was totally abrogated by addition of a CCR6-blocking antibody (Figure 6D). Regarding cell growth and viability, no difference was observed when lymphatic endothelial cells were treated with H $\beta$ Ds 1, 2 or 4 (Figure 6E-F). The lymphangiogenic activity of H $\beta$ Ds *in vivo* was then investigated using the CAM assay. Numerous vascular

structures, lined by alpha SMA-negative endothelial cells, were detectable on CAM sections. Immunohistochemical staining for the lymphatic biomarker Prox-1 confirmed the lymphatic nature of these vessels (Figure 6G). Image analysis was used to quantify CAM lymphangiogenic response from optical microscopy observation (Prox-1 staining). We demonstrated that both serum (positive control) and HβDs induce a significant increase in relative lymphatic vascular area compared to PBS (Figure 6H). This increased lymphatic vessel area was relied on a higher vessel number (Figure 6I). Similar to angiogenesis, HβD-overexpressing tumor specimens were associated with a higher tumor lymphangiogenesis compared to cancers displaying a weakly positive HβD immunoreactivity (Supplemental Figure 7). Collectively, our results support the implication of HβDs in lymphangiogenesis.

## DISCUSSION

Whatever the tumor location (cervix, head and neck, esophagus...), the overall survival rate for SCC is low, largely due to the capacity of cancer cells to disseminate via blood and/or lymphatic circulations. The formation of new blood vessels is well-known to play a key role during the tumor growth and metastasis processes [26]. Similarly, accumulating evidence suggests that lymphangiogenesis also promotes the tumor progression and regional lymph node involvement is both early sign of metastasis and one of the strongest poor prognostic indicators. Understanding the interplay between cancer cells and (lymph)angiogenesis could define new molecular targets that might prevent the very initial stage of tumor spreading from the primary site and, therefore, increase

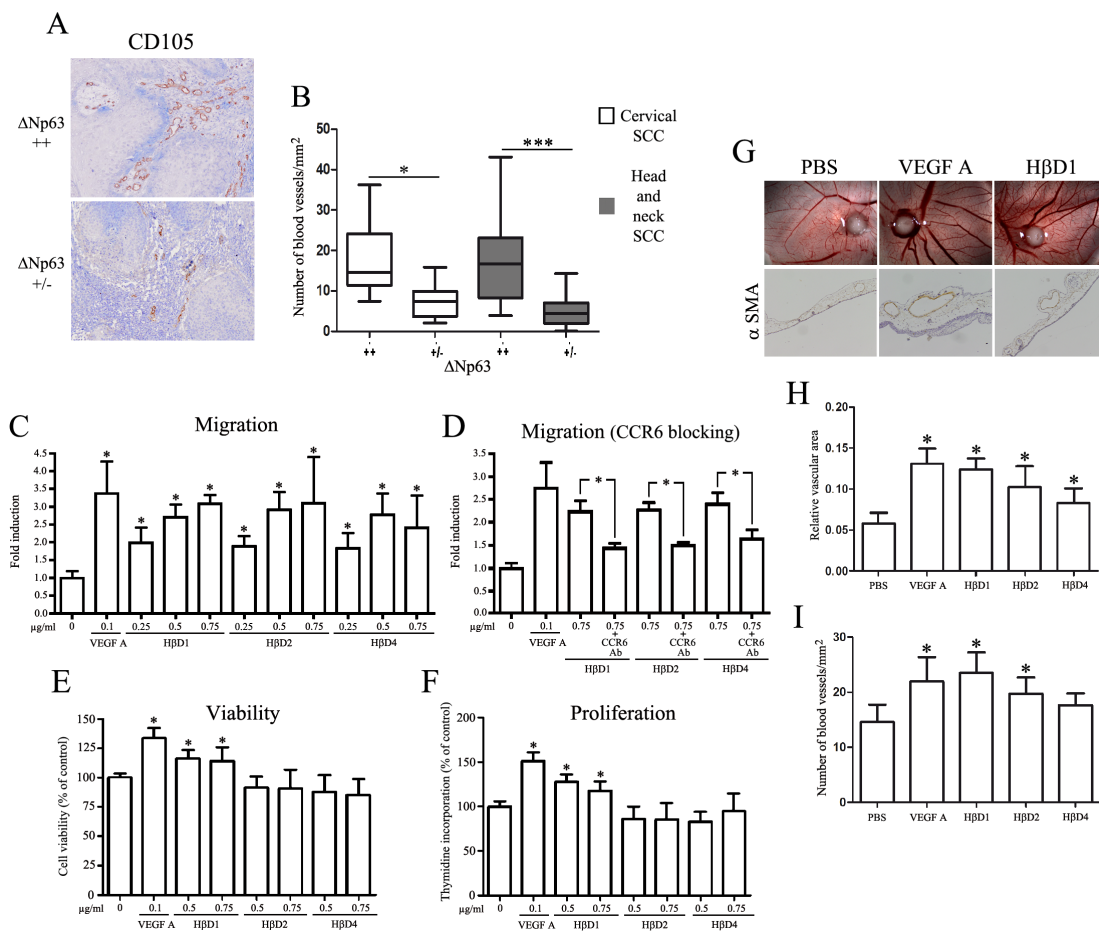

**Figure 5: ΔNp63-regulated HβDs enhance endothelial cell migration.** A: CD105 immunostaining showing the neformed blood vessel density in high and low ΔNp63-expressing SCC. Increased counts of CD105<sup>+</sup> blood vessels were detected in high ΔNp63-expressing cervical and head and neck SCC when compared to tumors with a weakly positive ΔNp63 immunoreactivity (B). The average number of blood vessels per mm<sup>2</sup> was measured as described in the “Materials and Methods” section. Influence of HβDs on endothelial cell migration in a Boyden Chamber assay (C), viability (E) and proliferation (F). The HβDs-related migratory ability of blood vessel cells was also measured with a CCR6-blocking antibody (D). PBS and VEGF-A were used as negative and positive control, respectively. Data are presented as the means ± standard deviation of four different experiments. G: Enhancement of angiogenesis by HβDs in the CAM assay. Representative images of alpha-SMA positive-blood vessels are shown. Quantification of blood vessels has been performed by computerized image analysis. (H) Relative vascular area and (I) number of blood vessels per mm<sup>2</sup> were determined. Asterisks indicate statistically significant differences (\*P < 0.05).

patient survival [27]. However, the molecular and cellular basis of blood and lymphatic abnormalities associated with cancers remains unclear and the subject of numerous investigations.

HβDs are antimicrobial peptides produced primarily by epithelial cells. Recently, several studies have showed the implication of HβDs in immune cell chemotaxis, activation as well as in wound healing suggesting that the collective effects of these small peptides extend well beyond their antiviral/bacterial activities [21]. Moreover, reports have analyzed the expression of HβDs in normal and (pre)neoplastic tissues at mRNA and protein

levels and showed that HβD-1 and 2 were particularly expressed in well differentiated oral SCC [28]. Although pro-inflammatory cytokines, bacterial products and TGF-β have been shown to induce HβD upregulation, transcription factors and associated signaling pathways that regulate the expression of HβDs still remain unknown. Furthermore, these data suggest that HβD expression could be regulated by multiple factors and be cell or tissue-type dependent [21].

In the current study, upon examination of several human SCC cell lines, we found a clear association between ΔNp63 and HβD-1, 2 and 4 expression. No

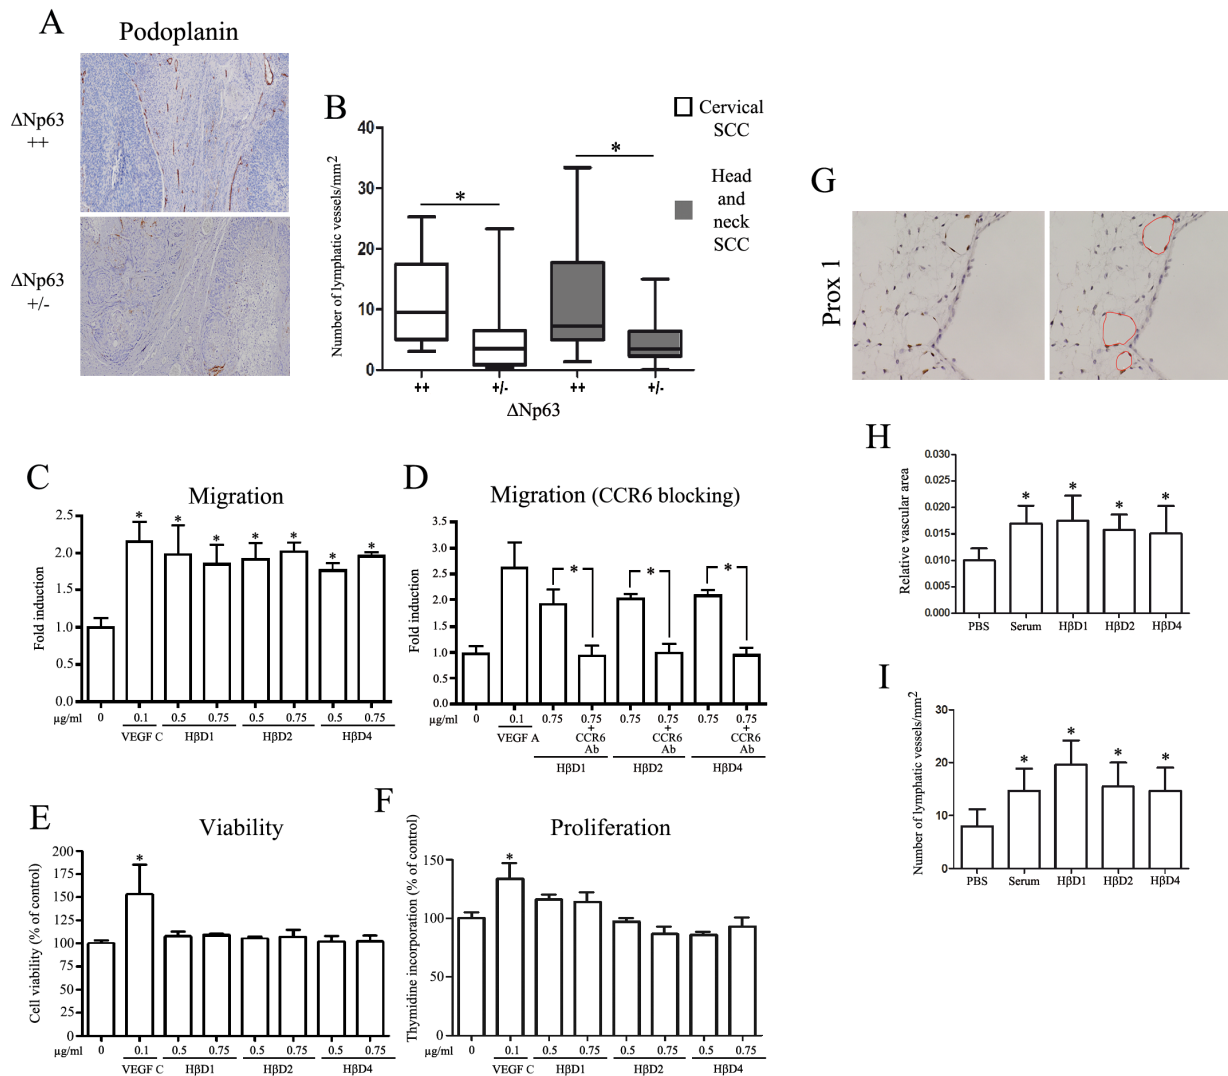

**Figure 6: ΔNp63-regulated HβDs promote lymphangiogenesis.** A: Anti-Podoplanin antibody was used to determine the lymphatic vessel density in high and low ΔNp63-expressing SCC. Increased counts of podoplanin<sup>+</sup> lymphatic vessels were observed in high ΔNp63-expressing cervical and head and neck SCC when compared to neoplastic lesions with a weakly positive ΔNp63 immunoreactivity (B). The average number of lymphatic vessels per mm<sup>2</sup> was determined. Influence of HβDs on lymphatic endothelial cell migration (C), viability (E) and proliferation (F) was analyzed as described in the Materials and Methods section. Boyden chamber assay of lymphatic endothelial cells with CCR6-blocking antibody was also performed (D). PBS and VEGF-C were used as negative and positive control, respectively. Data are presented as the means ± standard deviation of four different experiments. G: Enhancement of lymphangiogenesis by HβDs in the CAM assay. Representative images of Prox1 positive-blood vessels are shown. Quantification of lymphatic vessels has been performed by computerized image analysis. (H) Relative vascular area and (I) number of lymphatic vessels per mm<sup>2</sup> were determined. Asterisks indicate statistically significant differences (\*P < 0.05).



difference in terms of H $\beta$ D3 expression was observed between  $\Delta$ Np63-positive and negative cells. In order to demonstrate this relationship between p63 and H $\beta$ Ds, we transfected p63 isotype cDNAs in normal and SCC cells and demonstrated that, in contrast to TAp63 isoform,  $\Delta$ Np63 $\alpha$ ,  $\beta$  and  $\gamma$  increase H $\beta$ D expression at the mRNA levels. This H $\beta$ D upregulation was not related to an increased H $\beta$ D mRNA stability. Inversely, a decrease of H $\beta$ D-1, 2 and 4 expression following  $\Delta$ Np63 silencing was shown in HaCaT and HT-3 cells. By immunohistochemistry, we demonstrated that this downregulation of H $\beta$ D1, 2 and 4 in  $\Delta$ Np63-silenced cells was also observed at the protein level. We tried to confirm all these results by Western blot analysis. Numerous protocols were used. However, similarly to other studies and probably because of the small size of these peptides (2–6 kDa), it was impossible to detect H $\beta$ Ds, excepted when 0.5 or 1  $\mu$ g of recombinant proteins (positive control) was used. In agreement with our results and according to published microarray analyses, H $\beta$ D1 and 4 were two genes highly down-regulated (3 to 10 fold) after disruption of p63 expression in several cancer cell lines [24]. These data were obtained using a siRNA targeting all p63 transcripts.

To evaluate the association between H $\beta$ D-1, 2 and 4 and  $\Delta$ Np63 isoform expression in human SCC specimens, immunohistochemical analyses were performed. A significant increase in H $\beta$ D1, 2 and 4 immunoreactivity was observed when  $\Delta$ Np63 was overexpressed. In addition,  $\Delta$ Np63 and H $\beta$ D scores were correlated both in cervical and head and neck SCC confirming our *in vitro* results. Previous data from our laboratory and others showed variable degrees of nuclear p63 expression in SCC tissues [29, 30]. Furthermore, marked overexpression of  $\Delta$ Np63 has been recently associated with increased proliferation, radiation resistance and unfavorable outcome in the context of several cancers [9, 31–33]. Although  $\Delta$ Np63 may reduce apoptosis and promote cell proliferation, the implication of  $\Delta$ Np63 isoforms in soluble factor expression and cancer microenvironment has not been extensively explored. We demonstrated that  $\Delta$ Np63-regulated H $\beta$ Ds stimulate the migration of (lymphatic) endothelial cells in a CCR6-dependent manner which may explain partially the increased density of blood and lymphatic vessels observed in high  $\Delta$ Np63-expressing SCC. Beside H $\beta$ D upregulation, *in vitro* data showed that  $\Delta$ Np63 overexpression increases secretion of Interleukin 6, 8 and VEGF-A which could also promote angiogenesis in SCC microenvironment [34–35]. Regarding CCR6, the requirement of this chemokine receptor in H $\beta$ D-dependent enhanced migration was, however, higher in lymphatic cells suggesting that these peptides could promote blood vascular cell chemotaxis via an alternative receptor. The *in vitro* results showing an implication of H $\beta$ Ds in (lymph) angiogenesis were confirmed using the *in vivo* CAM assay. In contrast to chemoattraction, H $\beta$ Ds display a limited

effect on viability and proliferation of endothelial cells. In agreement with our results, Röhrli and collaborators recently showed an increased vascularization in mouse  $\beta$  defensin 14 overexpressing tumors. These authors also found that this enhanced angiogenesis is reduced in CCR6 knockout mice, indicating the requirement of CCR6 expression on mouse endothelial cells [36]. This chemokine receptor is also involved in H $\beta$ Ds-mediated human macrophage and mast cell chemoattraction.

Finally, the impact of  $\Delta$ Np63 expression on overall survival was evaluated. Overall survival was significantly higher for patients with low  $\Delta$ Np63 expression compared with those displaying a high expression for this p63 isoform. In agreement with our results, data reported that the overexpression of p63 in oral SCC was associated with poor radiation response and shorter survival [31, 32]. However, in contrast to our data, these studies did not reveal a potential mechanism and used a pan-antibody targeting all p63 transcripts; thus different p63 isoforms were not analyzed separately.

In conclusion, we demonstrated that  $\Delta$ Np63 isoforms affect H $\beta$ D expression in human SCC leading to increased blood and lymphatic vessel density in the tumor microenvironment and indirectly to a poor prognosis. Therefore, a treatment strategy aimed at reducing the adverse effects of H $\beta$ Ds may be effective at reducing metastasis dissemination and/or recurrence after surgery.

## MATERIALS AND METHODS

### Patients and tissue samples

Fifty-seven paraffin-embedded specimens of SCC [18 cervical SCC (mean age: 47  $\pm$  9 years) and 39 head and neck SCC (33 men and 6 women; mean age: 58  $\pm$  9 years)] were obtained from Pathology archives (University Hospital Center of Liege or Mons in the period between 2002 and 2010). Ten cases of normal ectocervical squamous epithelium were also retrieved. All cases were re-examined by a pathologist to confirm the diagnosis. Clinicopathological features were available for head and neck SCC patients (Table 1). These tissue samples were collected at the Tissue Bank of the University of Liege. The protocol was approved by the Ethics Committee of the University Hospital of Liege.

### Primary cells, cell lines and cell culture media

Normal human umbilical vein endothelial cells (HUVECs) and human microvascular endothelial cells (HMVEC) were purchased from Lonza (Verviers, Belgium) and were grown in MCDB 131 medium (Gibco-Invitrogen, Carlsbad, CA, USA) supplemented with 10% fetal bovine serum, 2mM glutamine, endothelial cell

growth supplement (12 ng/ml; BD Biosciences, Bedford, MA) and 2.5 mg/ml heparin. Immortalized lymphatic endothelial cells (hTERT-LEC) were cultured in EGM2-MV (Lonza) supplemented with 5% fetal bovine serum and glutamine. Immortalized human keratinocytes (HaCaT cells) and three genital SCC cell lines (A431, HT-3, SiHa) were grown in a 3:1 mixture of DMEM (Gibco) and Ham's F12 (Gibco) containing 10% fetal calf serum (FCS) and supplied with 1% non-essential amino acid (Gibco), 1% sodium pyruvate (Gibco) and 0.5% penicillin-streptomycin (Gibco). Two head and neck SCC cell lines (Detroit 562, RPMI 2650) were maintained in MEM (Gibco) containing 10% FCS and supplemented with 1% L-glutamine (Gibco). All the cell lines were incubated until a 60–70% confluence was reached.

### Immunohistochemistry

Immunohistochemical analysis of paraffin-embedded specimens was performed as previously described [29, 37, 38]. Antibodies anti- $\Delta$ Np63 (anti-p40; Calbiochem, Gibbstown, NJ, USA), anti-H $\beta$ D1 (Biologo, Kronshagen, Germany), anti-H $\beta$ D2 (Abcam, Cambridge, MA, USA), anti-H $\beta$ D4 (Abcam), anti-CD105 (Thermo Scientific, Waltham, MA, USA), anti-Podoplanin (Clone D2-40, Dako, Glostrup, Denmark), anti-alpha Smooth muscle actin (SMA) (Abcam) and anti-Prox1 (ReliaTech GmbH, Wolfenbuettel, Germany) were used for the primary reaction. Immunoperoxidase staining was performed using the Envision kit (Dako, Glostrup, Denmark) or the BrightVision Plus kit (Immunologic, Duiven, Netherlands) according to the supplier's recommendations. Positive cells were visualized using a 3, 3'-diaminobenzidine (DAB) substrate and the sections were counterstained with hematoxylin. A control IgG was used as negative control (Santa Cruz Biotechnology, Santa Cruz, CA, USA). To test the specificity of the H $\beta$ D staining, the different anti-H $\beta$ D antibodies were neutralized by the incubation with an excess of peptide. No immunoreactivity was observed in this condition.

### Immunostaining assessment

According to a protocol previously described [29, 37], two independent histopathologists evaluated the immunolabeled tissues by using a semi-quantitative score of the intensity and extent of the staining according to an arbitrary scale. For staining intensity, 0 represented samples in which the immunoreactivity was undetectable whereas 1, 2 and 3 denoted samples with, respectively, a low, moderate and strong staining. For staining extent, 0, 1, 2 and 3 represented samples in which the immunoreactivity was detectable, respectively, in <5%, 6–33%, 34–66% and >67% of the tumor cells. In order to provide a global score for each case, the results obtained

with the two scales were multiplied, yielding a single scale of 0, +1, +2, +3, +4, +6 or +9. This scoring system was validated using a computerized image analysis system (CAS; Becton Dickinson, Erembodegen, Belgium). The biopsies were classified into two groups: high (score >3) or low (score  $\leq$ 3)  $\Delta$ Np63 expression. Moreover, both the relative vascular area and the density of blood (CD105<sup>+</sup>) and lymphatic (Podoplanin<sup>+</sup> or Prox-1<sup>+</sup>) vessels in tumor microenvironment was quantified by computerized count (FSX 100 computerized image analysis system, Olympus, Hamburg, Germany), verified by manual counting and supervised by a histopathologist. The number of blood and lymphatic vessels was reported to the area around tumor cells yielding a count expressed as number of vessels/mm<sup>2</sup>. A similar computerized quantification method was used to quantify the number and the vessel density in lymph/angiogenic CAM images.

### Chicken chorioallantoic membrane (CAM) angiogenesis assay

On embryonic day 3, a window was open into the shell of fertilized chicken eggs. Four days later, methylcellulose 3 mm sponges saturated with 5  $\mu$ g H $\beta$ Ds were laid onto the egg chorionallantoic membrane. VEGF-A (1.5  $\mu$ g) (R and D systems, Minneapolis, MN, USA) or serum and PBS were used as positive and negative controls, respectively. Blood vessel density was evaluated and photographed on day 10. CAMs were then fixed (formalin) for 24 h, remove from the eggs and paraffin embedded using standard protocol. To identify blood and lymphatic vessels, anti-alpha SMA and anti-Prox1 were used, respectively. Thirteen CAMs were analyzed in each test group.

### RT-PCR and quantitative real-time PCR analysis

Total RNA was extracted (RNeasy mini kit, Qiagen, Valencia, CA, USA) and cDNA was generated by reverse transcription as previously described [39]. For quantitative real-time PCR experiments, 15 ng of cDNA were amplified in 25  $\mu$ l of 1 $\times$  SYBR-Green I qPCR master mix plus (Eurogentec, Seraing, Belgium), containing 200 or 300 nmol/L of each primer. Primer sequences were as follows: TAp63 forward, 5'-TGTATCCGCATGCAGGACT-3'; TAp63 reverse, 5'-CTGTGTTATAGGGACTGGTGGAC-3';  $\Delta$ Np63 forward, 5'-GAAAACAATGCCCAGACTCAA-3';  $\Delta$ Np63 reverse, 5'-TGCGCGTGGTCTGTGTTA-3'; H $\beta$ D1 forward, 5'-GTCGCCATGAGAACTCCCTACC-3'; H $\beta$ D1 reverse, 5'-CATTGCCCTCCACTGCTGAC-3'; H $\beta$ D2 forward, 5'-CCAGTTCCTGAAATCCTGAG-3'; H $\beta$ D2 reverse, 5'-CTCTGTAACAGGTGCCTTGA-3'; H $\beta$ D3 forward, 5'-AGTGACCAAGCACACCTTTTCA-3'; H $\beta$ D3

reverse, 5'-CCAAAAACAGGAAGAGCAAAGC-3'; H $\beta$ D4 forward, 5'-CCTGTTACCTGCCTTAAGAGTG-3'; H $\beta$ D4 reverse, 5'-GAATCCGCATCAGCCACAG-3'; HPRT reverse, 5'-GGTCCTTTTACCAGCAAGCT-3'; HPRT forward, 5'-TGACACTGGCAAAACAATGCA-3'; GAPDH reverse, 5'-ACCAGGTGGTCTCCTCTGAC-3'; GAPDH forward, 5'-TGCTGTAGCCAAATTCGTTG-3'. Thermal cycling conditions were: 50 °C for 2 min, 95°C for 10 min, 40 cycles of denaturation at 95°C for 15 s and annealing/extension at 60 °C for 1 min. All the experiments were performed in triplicate, using the ABI-Prism 7700 Sequence Detection System (Applied Biosystems, Foster City, CA, USA) and negative controls (master mix without any cDNA or RNA) were added in each run. Each quantitative real-time PCR experiment was normalized to the amount of HPRT or GAPDH mRNA from the same sample. The acquired data were analyzed by Sequence Detector software, Version 1.9 (Applied Biosystems). As an additional control, PCR products were run on 1.8% agarose gels containing ethidium bromide and visualized with an UV transilluminator.

### Western blotting analysis

Cells were lysed in a buffer containing 50 mM TRIS pH 7.5, 300 mM NaCl, 1 mM EDTA, 1% Nonidet P-40 (Igepal CA-630) (Sigma, Saint Louis, USA), 1 mM PMSF (Sigma) and protease/phosphatase inhibitors (Roche, Bale, Switzerland). After quantification (BCA protein assay; Pierce, Rockford, USA), western blot analysis was performed as previously described [37]. Anti- $\beta$ -actin (Sigma), anti- $\Delta$ Np63 (anti-p40, Calbiochem) and anti-TAp63 (Biolegend, San Diego, CA, USA) were used as primary antibodies.

### siRNA transfection and gene silencing

Small interfering RNA (siRNA) targeting specifically human  $\Delta$ Np63 (5'-UGCCCAGACUCAUUUAGU-3') was designed previously [29] and purchased from Eurogentec. The day before transfection, 10<sup>5</sup> cells per well of a six-well plate were seeded in 2 ml of appropriate growth medium. For each experiment, 50 ng of siRNA duplexes were transfected with the TransFectin lipid reagent (Bio-Rad, Hercules, CA, USA) according to the supplier's recommendations. A siRNA which does not match to any sequence in the human genome (Eurogentec) was used as control. The transfection of an Alexa Fluor 488-labeled control siRNA (Eurogentec) was performed in order to analyze the percentage of cells with siRNA uptake.

### Transient transfections of p63 isoform cDNAs

pcDNA3 expression vectors (Invitrogen) encoding each p63 isoform were kindly provided by Dr. Caron de Fromentel (INSERM U590, Lyon, France). 1.25 x 10<sup>5</sup> cells were plated in six-well plates. Twenty-four hours after plating, cells were transiently transfected with ExGene reagent (Fermentas, Burlington, Canada) (2  $\mu$ g plasmid DNA, 9  $\mu$ l ExGene in 200  $\mu$ l of 150 mmol/L NaCl). As a control, cells were transfected with the corresponding empty vector. A control transfection condition using a plasmid encoding GFP (pEGFP-IRESpuro, Clontech, CA, USA) was performed in parallel to determine the transfection efficiency. All experiments were set up to obtain at least 60% of transfected cells.

### Boyden chamber migration assay

Chemotactic migration of HUVEC, HMVEC and hTERT-LEC were assessed using the Boyden chamber assay [18]. 3 x 10<sup>4</sup> cells were suspended in serum-free medium supplemented with 0.1% BSA and placed in the upper compartment of a 48-well Boyden microchamber (Neuroprobe, Cabin John, MD, USA). For inhibitory experiments, blocking anti-CCR6 antibody (Clone 53103, R and D systems) was added 20 min at 37 °C before treatments were started. The lower compartment was filled with a VEGF-A (R and D systems) (0.1  $\mu$ g/ml), VEGF-C (R and D systems) (0.1  $\mu$ g/ml), H $\beta$ D1 (PeproTech, Rocky Hill, NJ, USA) (0.25 to 0.75  $\mu$ g/ml), H $\beta$ D2 (PeproTech) (0.25 to 0.75  $\mu$ g/ml) or H $\beta$ D4 (PeproTech) (0.25 to 0.75  $\mu$ g/ml) solution, containing 0.1% BSA. After 24 h of incubation at 37 °C, the cells that had migrated to the underside of the 8 $\mu$ m gelatin-coated filter (Poretics Corp., Livermore, CA, USA) were fixed and stained with Diff Quick Stain set (Baxter Diagnostics AG, Düringen, Switzerland). The upper side of the filter was scraped to remove residual non migrating cells. One random field was counted per well using an eyepiece with a calibrated grid to evaluate the number of fully migrated cells. Experiments were performed four times in sixuplicate.

### Cell viability/proliferation

Cell viability and proliferation were determined by using the Alamar blue colorimetric-based assay (AbD Serotec, Dusseldorf, Germany) and the 3H-thymidine incorporation assay, respectively. Twenty four hours before stimulation with H $\beta$ Ds, 50,000 cells per well of a six well plate (viability) or 5,000 cells per well of a ninety-six well plate (proliferation) were seeded in appropriate growth medium. Both cell viability and 3H-thymidine uptake were measured after 4 days of culture. For the proliferation assay, the incorporated 3H-thymidine was

normalized to the total number of cells.

## Statistical analysis

Statistical analysis was performed with InStat 3 software (Graph-Pad Software, San Diego, CA, USA). The statistical significance of the results was calculated by using a Student's *t* test (immunostaining) or a Mann-Whitney test (cell proliferation, migration, viability, quantitative real-time PCR). The correlations among the staining intensity of  $\Delta$ Np63, H $\beta$ D1, H $\beta$ D2 and H $\beta$ D4 were assessed using Spearman's correlation analysis. Categorical data from independent groups were compared using the Fisher's Exact Test. Overall survival was defined as the time from the date of registration to the date of death. Standard survival time analyses were performed using Kaplan–Meier curves. Differences were considered as statistically significant when *P* values were less than 0.05.

## ACKNOWLEDGEMENT AND GRANT SUPPORT

This study was supported by the Belgian Fund for Medical Scientific Research, by the Centre Anti-Cancereux près l'Université de Liège, by the Faculty of Medicine of the University of Liège and by the Fonds Léon Frédéricq. The authors acknowledge the GIGA-imaging and Flow Cytometry facility. M.H. and M.S.C. are Postdoctoral Researcher and Research fellow of the Belgian National Fund for Scientific Research, respectively.

## REFERENCES

- 1 Yang A, Kaghad M, Wang Y, Gillett E, Fleming MD, Dötsch V, Andrews NC, Caput D, and McKeon F. p63, a p53 homolog at 3q27-29, encodes multiple products with transactivating, death-inducing, and dominant-negative activities. *Mol Cell*. 1998; 2: 305-316.
- 2 Koster MI, Kim S, Mills AA, DeMayo FJ, and Roop DR. p63 is the molecular switch for initiation of an epithelial stratification program. *Genes Dev*. 2004; 18: 126-131.
- 3 Truong AB, Kretz M, Ridky TW, Kimmel R, and Khavari PA. p63 regulates proliferation and differentiation of developmentally mature keratinocytes. *Genes Dev*. 2006; 20: 3185-3197.
- 4 Senoo M, Pinto F, Crum CP, and McKeon F. p63 Is essential for the proliferative potential of stem cells in stratified epithelia. *Cell*. 2007; 129: 523-536.
- 5 Di Como CJ, Urist MJ, Babayan I, Drobnjak M, Hedvat CV, Teruya-Feldstein J, Pohar K, Hoos A, and Cordon-Cardo C. p63 expression profiles in human normal and tumor tissues. *Clin Cancer Res*. 2002; 8: 494-501.
- 6 Mills AA. p63: oncogene or tumor suppressor? *Curr Opin*

- 7 Su X, Chakravarti D, and Flores ER. p63 steps into the limelight: crucial roles in the suppression of tumorigenesis and metastasis. *Nat Rev Cancer*. 2013; 13: 136-143.
- 8 Gallant-Behm CL, Ramsey MR, Bensard CL, Nojek I, Tran J, Liu M, Ellisen LW, and Espinosa JM. DeltaNp63alpha represses anti-proliferative genes via H2A.Z deposition. *Genes Dev*. 2012; 26: 2325-2336.
- 9 Leonard MK, Kommagani R, Payal V, Mayo LD, Shamma HN, and Kadakia MP. DeltaNp63alpha regulates keratinocyte proliferation by controlling PTEN expression and localization. *Cell Death Differ*. 2011; 18: 1924-1933.
- 10 Wu G, Osada M, Guo Z, Fomenkov A, Begum S, Zhao M, Upadhyay S, Xing M, Wu F, Moon C, Westra WH, Koch WM, Mantovani R, Califano JA, Ratovitski E, Sidransky D, and Trink B. DeltaNp63alpha up-regulates the Hsp70 gene in human cancer. *Cancer Res*. 2005; 65: 758-766.
- 11 Celardo I, Antonov A, Amelio I, Annicchiarico-Petruzzelli M, and Melino G. p63 transcriptionally regulates the expression of matrix metalloproteinase 13. *Oncotarget*. 2014; accepted.
- 12 Guo X, Keyes WM, Papazoglu C, Zuber J, Li W, Lowe SW, Vogel H, and Mills AA. TAp63 induces senescence and suppresses tumorigenesis in vivo. *Nat Cell Biol*. 2009; 11: 1451-1457.
- 13 Su X, Chakravarti D, Cho MS, Liu L, Gi YJ, Lin YL, Leung ML, El-Naggar A, Creighton CJ, Suraokar MB, Wistuba I, and Flores ER. TAp63 suppresses metastasis through coordinate regulation of Dicer and miRNAs. *Nature*. 2010; 467: 986-990.
- 14 Mattiske S, Ho K, Noll JE, Neilsen PM, Callen DF, and Suetani RJ. TAp63 regulates oncogenic miR-155 to mediate migration and tumor growth. *Oncotarget*. 2013; 4: 1894-1903.
- 15 Chen H, Xu Z, Peng L, Fang X, Yin X, Xu N, and Cen P. Recent advances in the research and development of human defensins. *Peptides*. 2006; 27: 931-940.
- 16 Ganz T. Defensins: antimicrobial peptides of innate immunity. *Nat Rev Immunol*. 2003; 3: 710-720.
- 17 Klotman ME and Chang TL. Defensins in innate antiviral immunity. *Nat Rev Immunol*. 2006; 6: 447-456.
- 18 Hubert P, Herman L, Maillard C, Caberg JH, Nikkels A, Pierard G, Foidart JM, Noel A, Boniver J, and Delvenne P. Defensins induce the recruitment of dendritic cells in cervical human papillomavirus-associated (pre)neoplastic lesions formed in vitro and transplanted in vivo. *FASEB J*. 2007; 21: 2765-2775.
- 19 Yang D, Chen Q, Chertov O and Oppenheim JJ. Human neutrophil defensins selectively chemoattract naive T and immature dendritic cells. *J Leukoc Biol*. 2000; 68: 9-14.
- 20 Yang D, Chertov O, Bykovskaia SN, Chen Q, Buffo MJ, Shogan J, Anderson M, Schröder JM, Wang JM, Howard OM, and Oppenheim JJ. Beta-defensins: linking innate and adaptive immunity through dendritic and T cell CCR6.

- Science. 1999; 286: 525-528.
- 21 Weinberg A, Jin G, Sieg S, and McCormick TS. The yin and yang of human Beta-defensins in health and disease. *Front Immunol.* 2012; 3: 294.
  - 22 Jin G, Kawsar HI, Hirsch SA, Zeng C, Jia X, Feng Z, Ghosh SK, Zheng QY, Zhou A, McIntyre TM, and Weinberg A. An antimicrobial peptide regulates tumor-associated macrophage trafficking via the chemokine receptor CCR2, a model for tumorigenesis. *PLoS One.* 2010; 5: e10993.
  - 23 Baroni A, Donnarumma G, Paoletti I, Longanesi-Cattani I, Bifulco K, Tufano MA, and Carriero MV. Antimicrobial human beta-defensin 2 stimulates migration, proliferation and tube formation of human umbilical vein endothelial cells. *Peptides.* 2009; 30: 267-272.
  - 24 Barbieri CE, Tang LJ, Brown KA, and Pietenpol JA. Loss of p63 leads to increased cell migration and up-regulation of genes involved in invasion and metastasis. *Cancer Res.* 2006; 66: 7589-7597.
  - 25 Dallas NA, Samuel S, Xia L, Fan F, Gray MJ, Lim SJ, and Ellis LM. Endoglin (CD105): a marker of tumor vasculature and potential target for therapy. *Clin Cancer Res.* 2008; 14: 1931-1937.
  - 26 Foubert P, and Varner JA. Integrins in tumor angiogenesis and lymphangiogenesis. *Methods Mol Biol.* 2012; 757: 471-486.
  - 27 Duong T, Koopman P, and Francois M. Tumor lymphangiogenesis as a potential therapeutic target. *J Oncol* 2012; 2012: 204946.
  - 28 Mizukawa N, Sawaki K, Yamachika E, Fukunaga J, Ueno T, Takagi S, and Sugahara T. Presence of human beta-defensin-2 in oral squamous cell carcinoma. *Anticancer Res.* 2000; 20: 2005-2007.
  - 29 Herfs M, Hubert P, Suarez-Carmona M, Reschner A, Saussez S, Bex G, Savagner P, Boniver J, and Delvenne P. Regulation of p63 isoforms by snail and slug transcription factors in human squamous cell carcinoma. *Am J Pathol.* 2010; 176: 1941-1949.
  - 30 Higashikawa K, Yoneda S, Tobiume K, Taki M, Shigeishi H, and Kamata N. Snail-induced down-regulation of DeltaNp63alpha acquires invasive phenotype of human squamous cell carcinoma. *Cancer Res.* 2007; 67: 9207-9213.
  - 31 Moergel M, Abt E, Stockinger M, and Kunkel M. Overexpression of p63 is associated with radiation resistance and prognosis in oral squamous cell carcinoma. *Oral Oncol.* 2010; 46: 667-671.
  - 32 Lo Muzio L, Santarelli Santarelli A, Caltabiano R, Rubini C, Pieramici T, Trevisiol L, Carinci F, Leonardi R, De Lillo A, Lanzafame S, Bufo P, and Piattelli A. p63 overexpression associates with poor prognosis in head and neck squamous cell carcinoma. *Hum Pathol* 2005; 36: 187-194.
  - 33 Matin RN, Chikh A, Chong Chong SL, Mesher D, Graf M, Sanza' P, Senatore V, Scatolini M, Moretti F, Leigh IM, Proby CM, Costanzo A, Chiorino G, Cerio R, Harwood CA, and Bergamaschi D. p63 is an alternative p53 repressor in melanoma that confers chemoresistance and a poor prognosis. *J Exp Med.* 2013; 210: 581-603.
  - 34 Senoo M, Matsumura Y, and Habu S. TAp63gamma (p51A) and dNp63alpha (p73L), two major isoforms of the p63 gene, exert opposite effects on the vascular endothelial growth factor (VEGF) gene expression. *Oncogene.* 2002; 21: 2455-2465.
  - 35 Bid HK, Roberts RD, Cam M, Audino A, Kurmasheva RT, Lin J, Houghton PJ, and Cam H. ΔNp63 Promotes Pediatric Neuroblastoma and Osteosarcoma by Regulating Tumor Angiogenesis. *Cancer Res.* 2014; 74: 320-329.
  - 36 Rohrl J, Huber B, Koehl GE, Geissler EK, and Hehlhans T. Mouse beta-defensin 14 (Defb14) promotes tumor growth by inducing angiogenesis in a CCR6-dependent manner. *J Immunol.* 2012; 188: 4931-4939.
  - 37 Herfs M, Hubert P, Poirrier AL, Vandevenne P, Renoux V, Habraken Y, Cataldo D, Boniver J, and Delvenne P. Proinflammatory cytokines induce bronchial hyperplasia and squamous metaplasia in smokers: implications for chronic obstructive pulmonary disease therapy. *Am J Respir Cell Mol Biol.* 2012; 47: 67-79.
  - 38 Herfs M, Vargas SO, Yamamoto Y, Howitt BE, Nucci MR, Hornick JL, McKeon FD, Xian W, and Crum CP. A novel blueprint for 'top down' differentiation defines the cervical squamocolumnar junction during development, reproductive life, and neoplasia. *J Pathol.* 2013; 229: 460-468.
  - 39 Herfs M, Hubert P, Kholod N, Caberg JH, Gilles C, Bex G, Savagner P, Boniver J, and Delvenne P. Transforming growth factor-beta1-mediated slug and snail transcription factor up-regulation reduces the density of Langerhans cells in epithelial metaplasia by affecting E-cadherin expression. *Am J Pathol.* 2008; 172: 1391-1402.
